# Supplementary material for: Inhibition of focal adhesion kinase 2 results in a macrophage polarization shift to M2 which attenuates local and systemic inflammation and reduces heterotopic ossification after polysystem extremity trauma
Source: PubMed Central journal article supplement (PMC10728492; doi:10.3389/fimmu.2023.1280884), 2023-12-05
Supplement: Image_2.pdf [file Image_2.pdf]

Supplemental Figure 2:

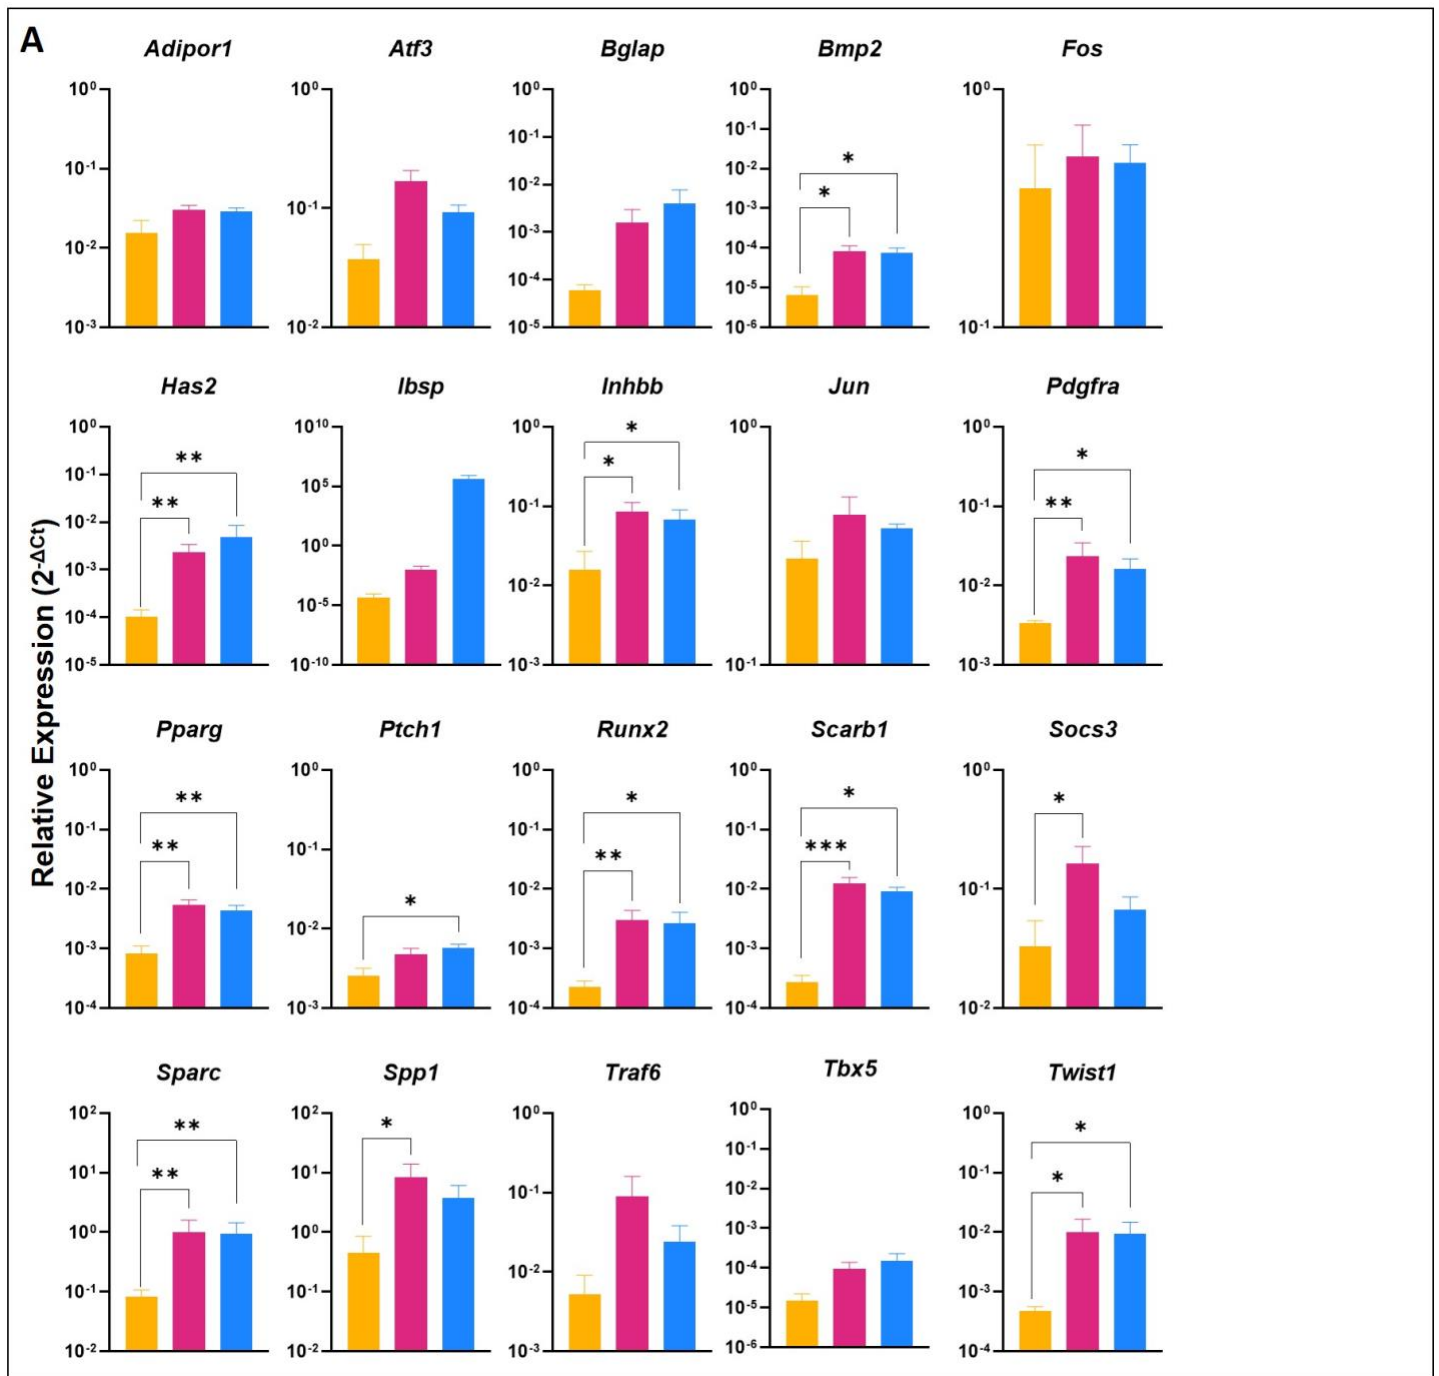

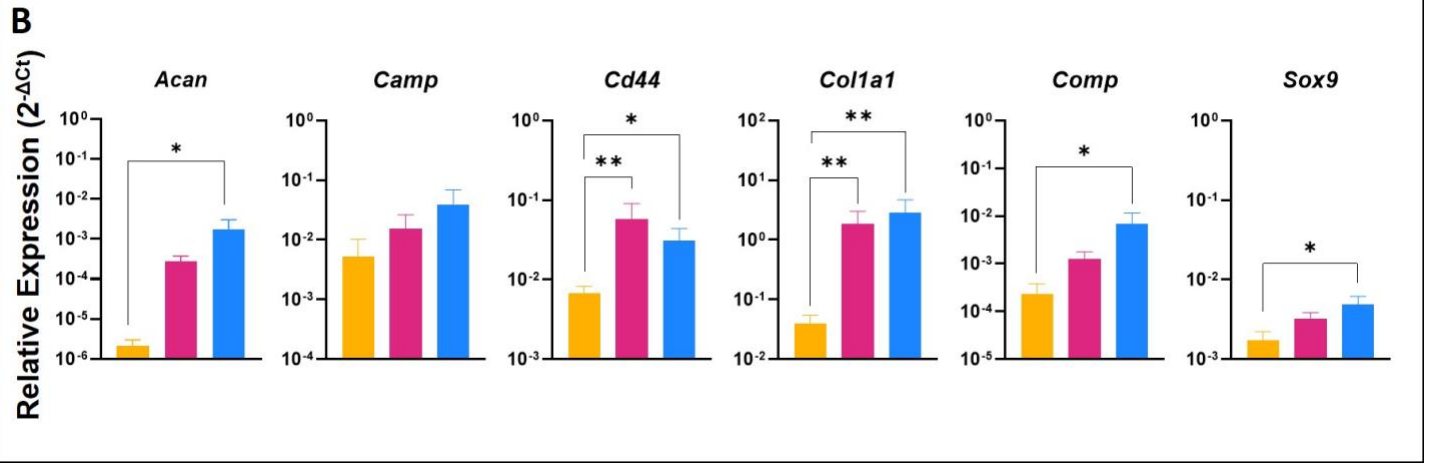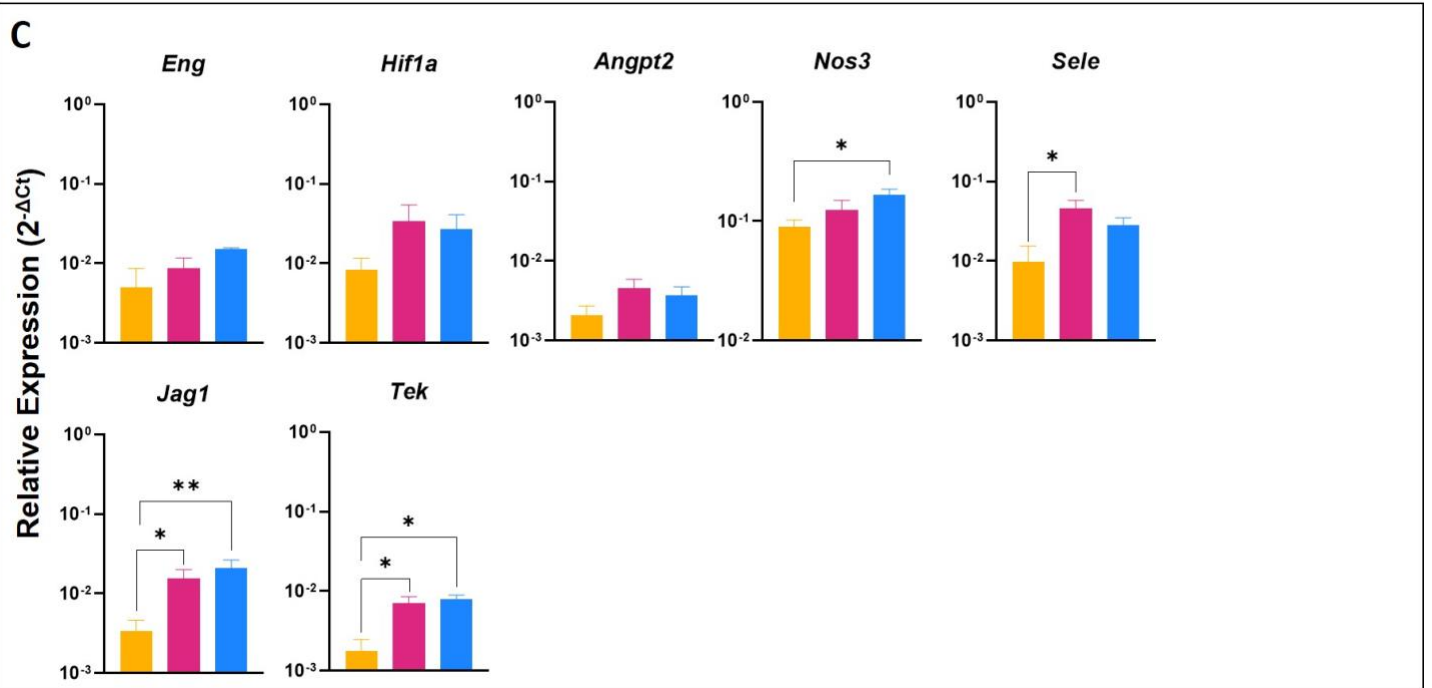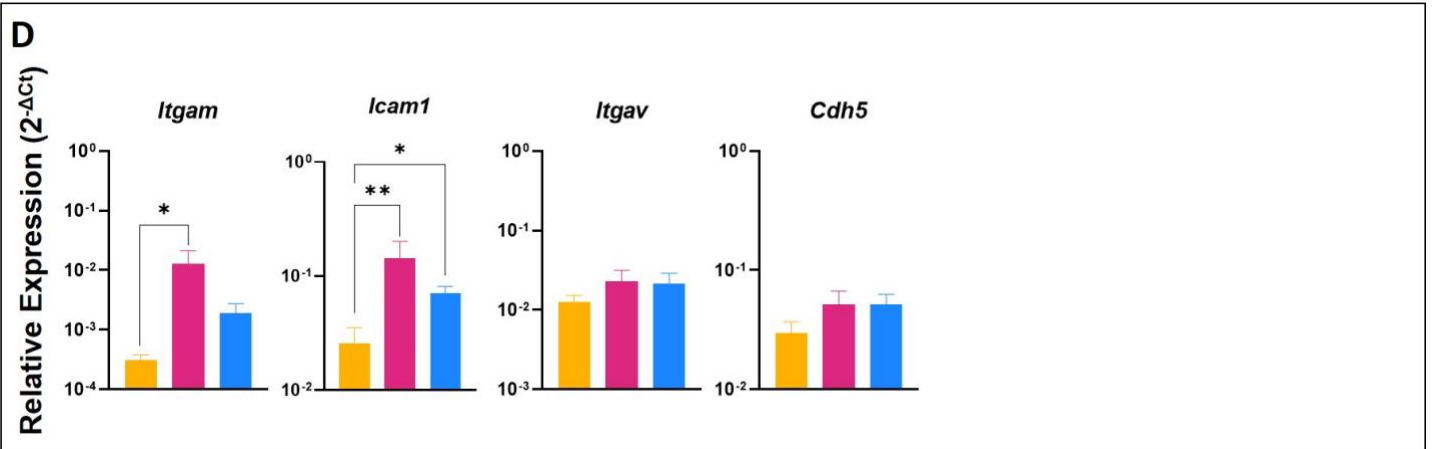

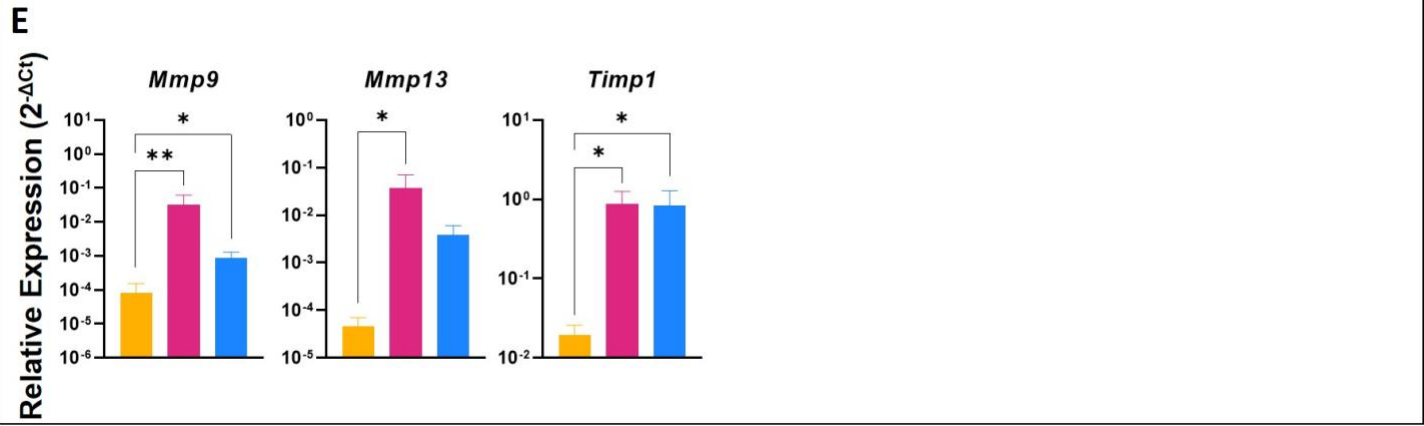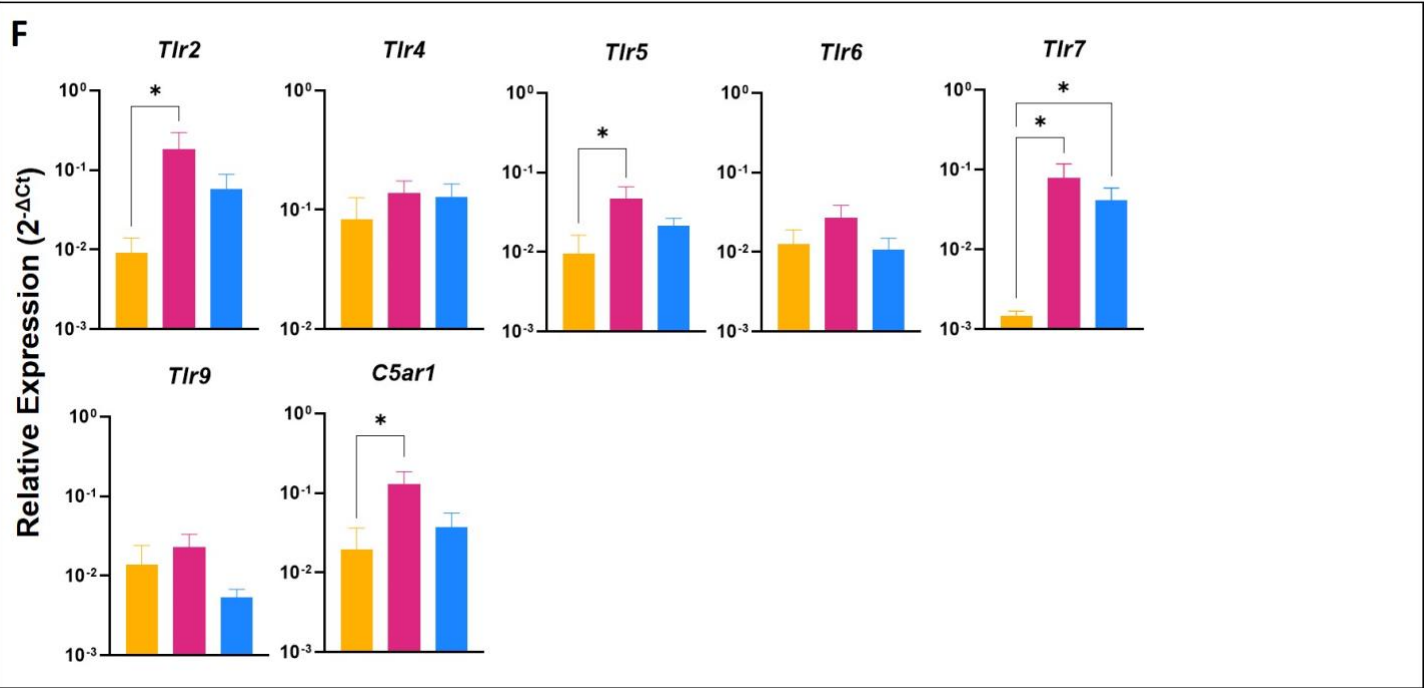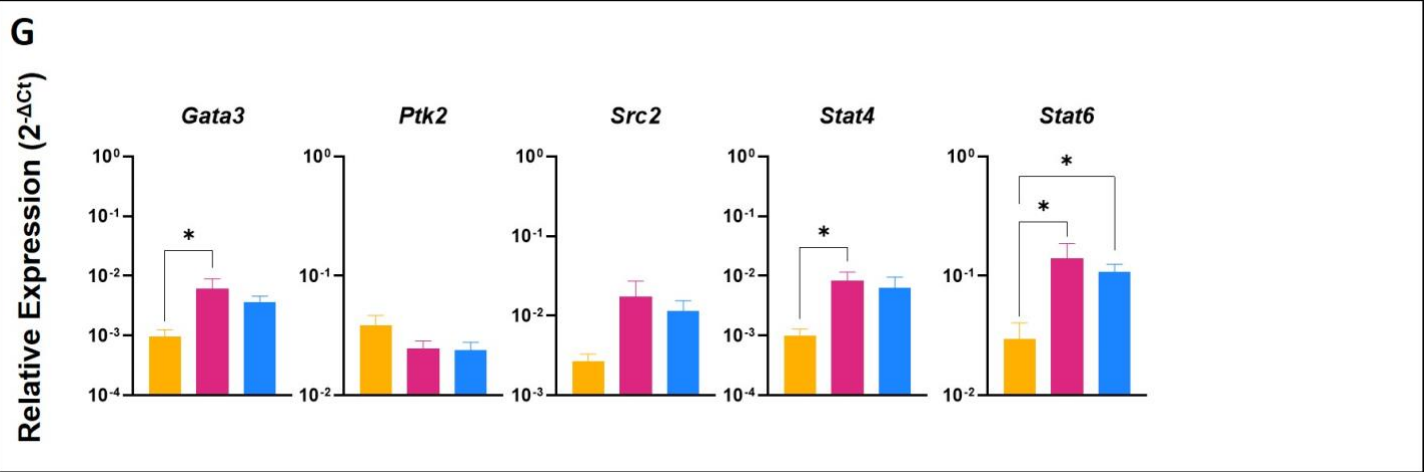

**I**Relative Expression ( $2^{-\Delta\Delta Ct}$ )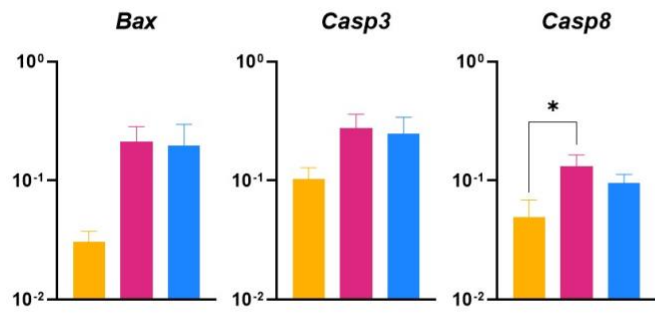

■ Naïve ■ Vehicle ■ Defactinib (PF-573228)
